# Supplementary material for: Neutrophil Extracellular Traps Contribute to COVID-19 Hyperinflammation and Humoral Autoimmunity
Source: MDPI journal article supplement (doi:10.3390/cells10102545), 2021-09-26
Supplement: s1 [file s1]

## Supplementary material

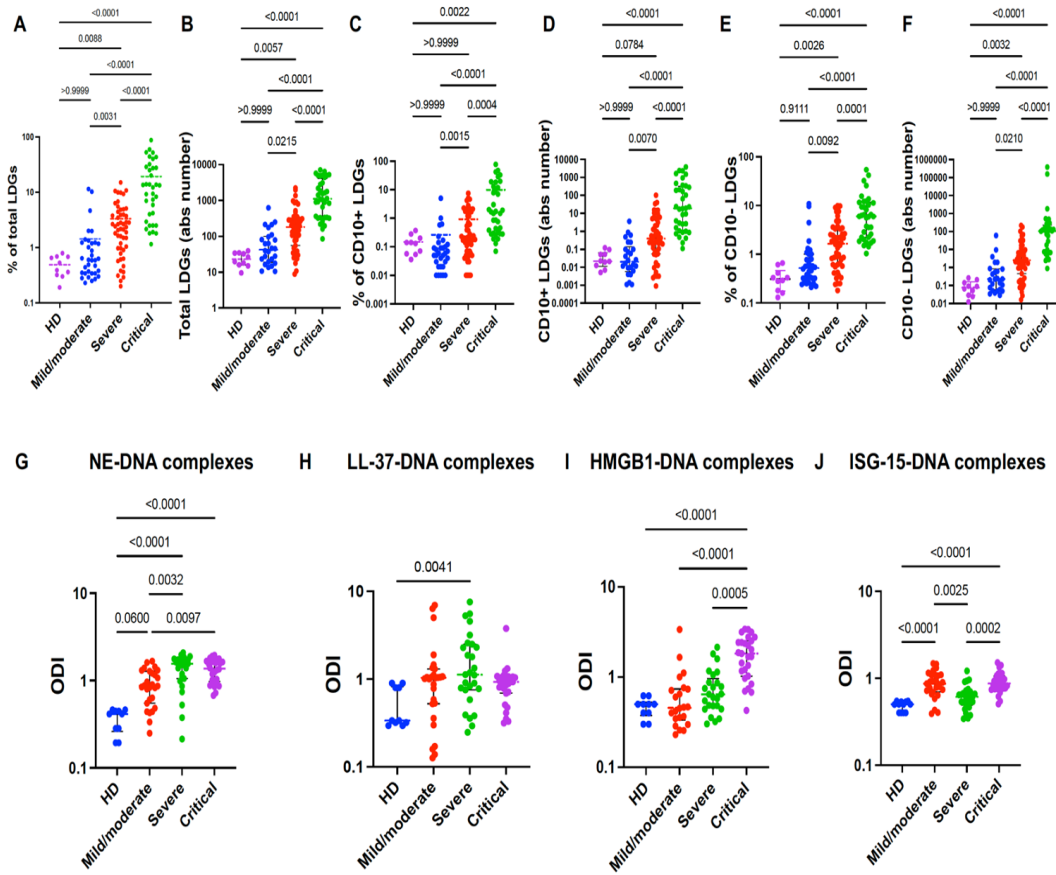

**Figure S1.** Proportion of the subsets of low-density granulocytes and amount of circulating NETs according to COVID-19 severity. A-F. The proportion and absolute number of low-density granulocytes augment according to disease severity. Immature CD10- LDG predominate in patients with COVID-19. G-J. Patients with critical COVID-19 have a higher amount of plasmatic neutrophil elastase (NE)-DNA, HMGB1-DNA and ISG-15-DNA complexes. Subjects with severe COVID-19 show an increased plasmatic concentration of LL-37-DNA complexes and a lower amount of ISG-15-DNA complexes. All the dot plots are shown in a logarithmic scale. The amount of circulating plasmatic NETs is expressed as the optic density index (ODI). Medians were compared with the Kruskal-Wallis and the Dunn's tests for multiple comparisons.

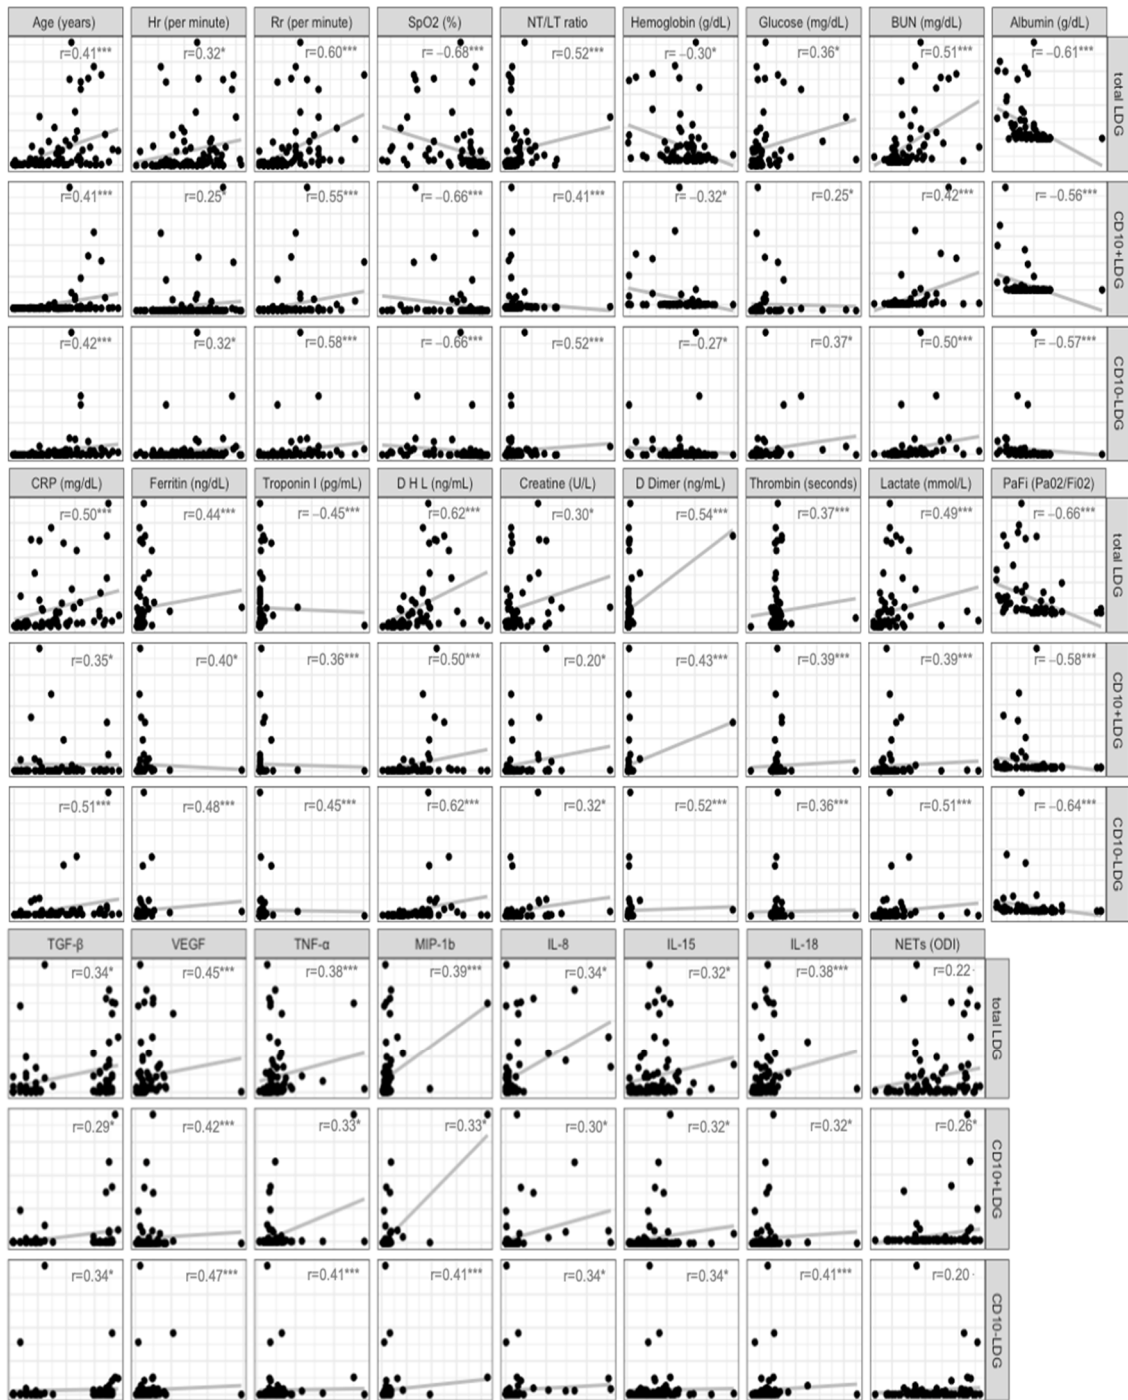

Figure S2. Correlations between the LDG subsets and the inflammatory and severity markers of COVID-19.

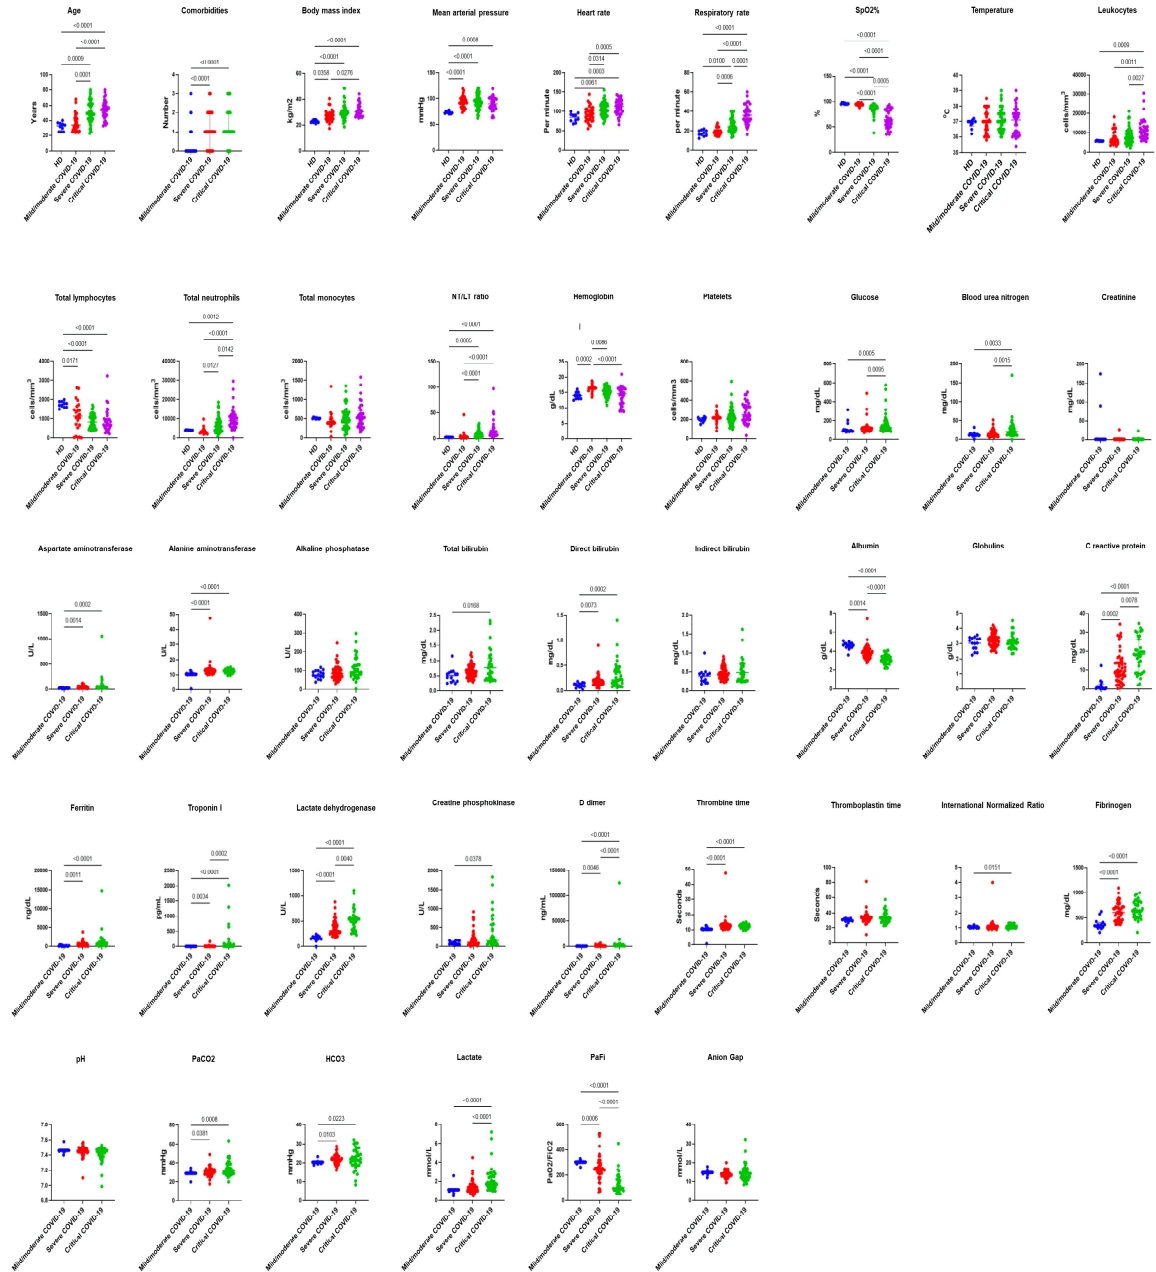

**Figure S3.** Clinical features of patients with SARS-CoV-2 infection according to COVID-19 severity. Differences between medians were addressed with the Kruskal-Wallis and the Dunn's tests for multiple comparisons.

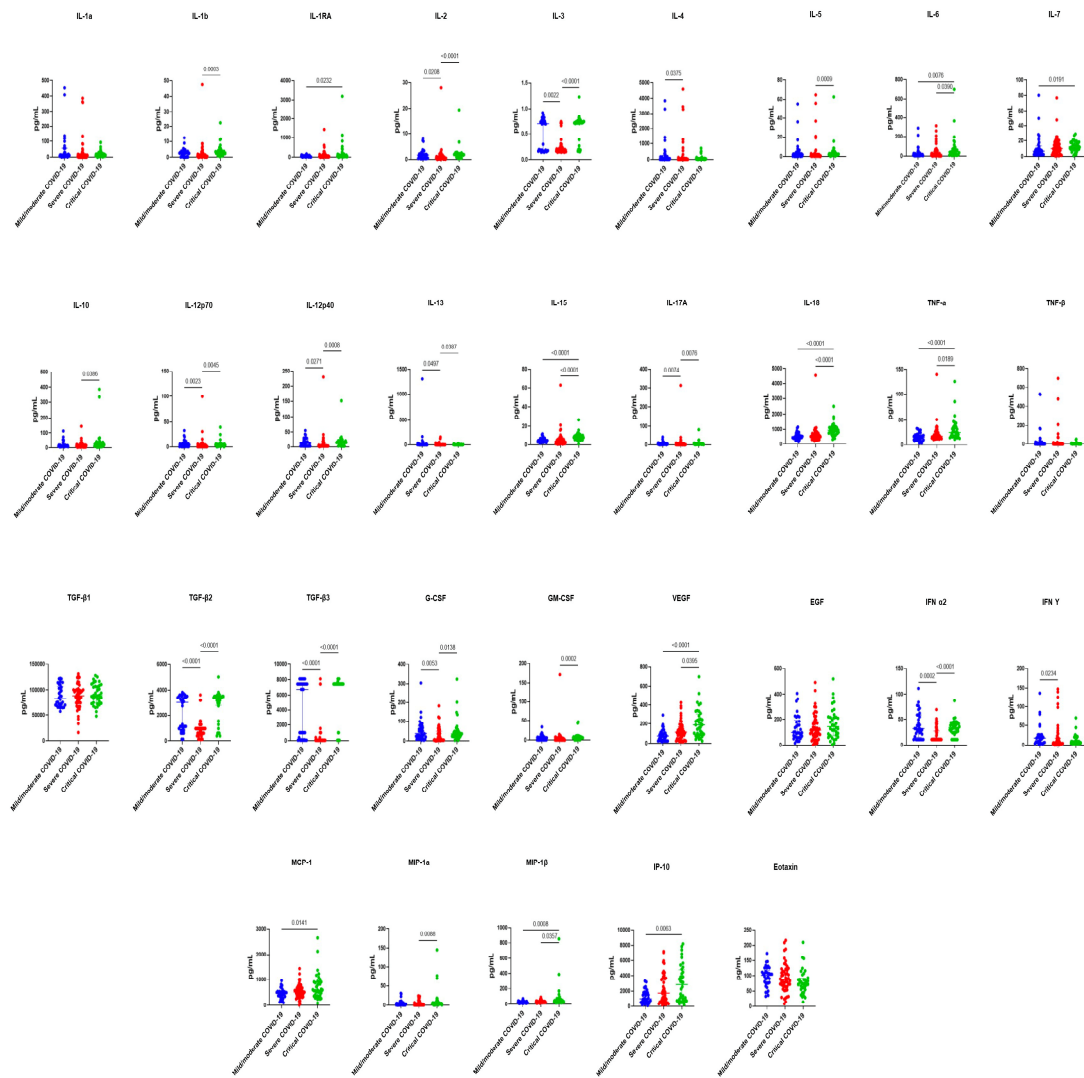

**Figure S4.** Serum levels of cytokines and chemokines according to the COVID-19 severity. Medians were compared with the Kruskal-Wallis and Dunn's tests for multiple comparisons.

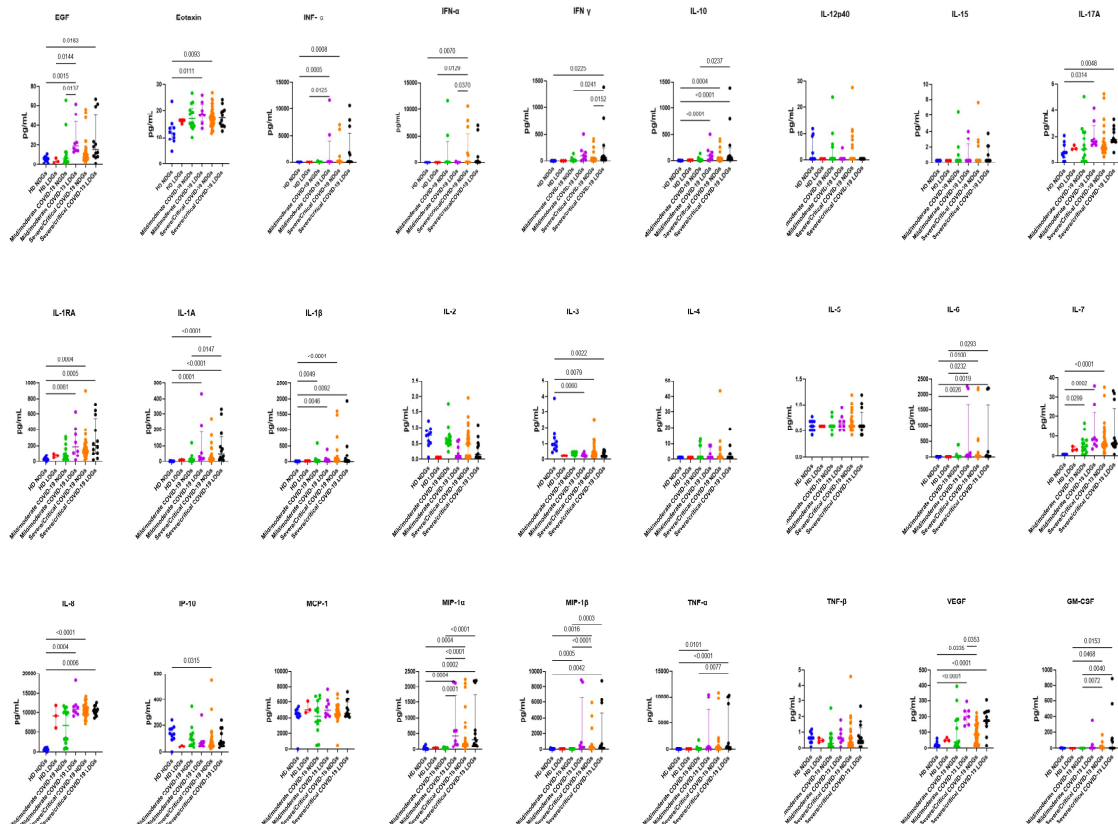

**Figure S5.** Cytokines and chemokines secreted by macrophages from healthy donors after stimulation with NETs. Two million macrophages were stimulated with 50 mcg of NETs for 6 hours. The levels of cytokines and chemokines were addressed in the supernatants. Differences between medians were assessed with the Kriskal-Wallis and Dunn's tests for multiple comparisons.

**Table S1.** Clinical features of healthy donors and patients with COVID-19 according to disease severity.

| Variable                                   | Healthy donors<br>Median<br>(IQR)<br>N=10 | Mild/moderate<br>Median (IQR)<br>N=27 | Severe<br>Median (IQR)<br>N=27 | Critical<br>Median (IQR)<br>N=28 | P-value |
|--------------------------------------------|-------------------------------------------|---------------------------------------|--------------------------------|----------------------------------|---------|
| <b>Demographic features</b>                |                                           |                                       |                                |                                  |         |
| Male N (%)                                 | 6 (60.00%)                                | 16 (59.25%)                           | 18 (66.66%)                    | 24 (85.71%)                      | -       |
| Age (years)                                | 33.00 (25.00-36.25)                       | 35.00 (27.50-42.50)                   | 48.00 (40.50-60.50)            | 56.00 (47.75-63.25)              | <0.001  |
| Comorbidities (Number)                     | 0 (0-0)                                   | 0.00 (0.00-0.00)                      | 1.00 (0.00-2.00)               | 1.00 (1.00-2.00)                 | <0.001  |
| <b>Clinical features</b>                   |                                           |                                       |                                |                                  |         |
| Body mass index (kg/m <sup>2</sup> )       | 23.00 (22.00-24.00)                       | 26.80 (24.25-29.20)                   | 29.50 (27.25-31.21)            | 30.10 (25.65-34.38)              | 0.011   |
| Mean arterial pressure (mmHg)              | 73.00 (70.75-78.00)                       | 93.00 (86.00-100.00)                  | 93.00 (78.30-104.50)           | 86.00 (47.75-65.50)              | 0.636   |
| Heart rate (beats per minute)              | 85.00 (74.50-93.00)                       | 94.00 (81.50-104.50)                  | 105.00 (92.50-118.50)          | 111.50 (96.75-128.25)            | 0.008   |
| Respiratory rate (per minute)              | 17.00 (14.75-20.25)                       | 18.00 (17.00-22.00)                   | 24.00 (22.00-29.50)            | 33.50 (30.00-40.00)              | <0.001  |
| (SpO <sub>2</sub> , %)                     | 96.00 (95.00-97.25)                       | 95.00 (94.00-95.00)                   | 88.00 (85.00-91.00)            | 66.00 (51.50-83.25)              | <0.001  |
| Temperature (°C)                           | 37.00 (36.73-37.03)                       | 37.00 (36.50-37.55)                   | 37.30 (37.00-37.50)            | 36.80 (36.17-37.50)              | 0.111   |
| <b>Laboratory parameters</b>               |                                           |                                       |                                |                                  |         |
| Leukocytes (cells/mm <sup>3</sup> )        | 5700 (5575-5825)                          | 7650.00 (5200.0-16275.00)             | 7700.00 (5300.00-10450.00)     | 10700.00 (8075.00-13075.00)      | 0.058   |
| Total lymphocytes (cells/mm <sup>3</sup> ) | 1750 (1600-1900)                          | 1436.00 (1059.00-1487.77)             | 676.00 (505.00-1052.00)        | 809.50 (583.00-1192.80)          | <0.001  |
| Total neutrophils (cells/mm <sup>3</sup> ) | 4161 (4070-4252)                          | 3715.00 (3501.00-3715.00)             | 6100.00 (4338.00-8568.00)      | 9158.00 (6895.00-11934.00)       | <0.001  |
| Total monocytes (cells/mm <sup>3</sup> )   | 513 (501.80-524.30)                       | 395.00 (395.00-401.80)                | 462.00 (311.00-583.50)         | 532.50 (387.00-663.5)            | 0.035   |
| NT/LT ratio                                | 2.40 (2.24-2.57)                          | 2.50 (2.17-3.12)                      | 9.35 (5.95-13.04)              | 10.51 (6.35-15.81)               | <0.001  |
| Hemoglobin (g/dL)                          | 14.00 (13.00-15.00)                       | 16.35 (16.35-16.35)                   | 15.60 (14.20-16.80)            | 14.75 (11.60-16.12)              | <0.001  |
| Platelets (cells/mm <sup>3</sup> )         | 200 (185.00-220.00)                       | 217.80 (217.80-217.80)                | 215.00 (189.50-270.00)         | 238.00 (194.80-333.00)           | 0.162   |
| Glucose (mg/dL)                            |                                           | 101.00 (96.00-107.00)                 | 107.00 (102.00-125.50)         | 146.5 (111.00-208.50)            | <0.001  |
| Blood Urea Nitrogen (mg/dL)                |                                           | 13.80 (12.50-33.00)                   | 14.00 (10.80-19.65)            | 23.35 (14.97-35.52)              | 0.005   |

|                                  |  |                        |                        |                           |        |
|----------------------------------|--|------------------------|------------------------|---------------------------|--------|
| Creatinine (mg/dL)               |  | 0.97 (0.79-1.07)       | 0.95 (0.77-1.15)       | 0.99 (0.78-1.23)          | 0.693  |
| Aspartate aminotransferase (U/L) |  | 23.10 (20.30-32.00)    | 37.00 (29.00-62.00)    | 47.90 (32.92-89.33)       | <0.001 |
| Alanine aminotransferase (U/L)   |  | 3.00 (1.00-6.00)       | 40.00 (22.85-52.30)    | 39.45 (31.45-63.58)       | 0.166  |
| Alkaline phosphatase (U/L)       |  | 78.00 (69.00-93.00)    | 99.00 (67.00-116.50)   | 97.50 (80.75-130.00)      | 0.264  |
| Total bilirubin (mg/dL)          |  | 0.56 (0.45-0.60)       | 0.65 (0.50-0.75)       | 0.77 (0.43-1.04)          | 0.093  |
| Direct bilirubin (mg/dL)         |  | 0.10 (0.09-0.14)       | 0.19 (0.15-0.23)       | 0.23 (0.15-0.43)          | <0.001 |
| Indirect bilirubin (mg/dL)       |  | 0.42 (0.36-0.46)       | 0.46 (0.34-0.51)       | 0.48 (0.27-0.72)          | 0.418  |
| Albumin (g/dL)                   |  | 4.63 (4.40-4.78)       | 3.63 (3.39-4.19)       | 3.24 (2.81-3.55)          | <0.001 |
| Globulins (g/dL)                 |  | 3.02 (2.70-3.35)       | 3.22 (2.92-3.40)       | 3.08 (2.79-3.27)          | 0.364  |
| C reactive protein (mg/dL)       |  | 1.16 (0.45-2.40)       | 10.94 (6.91-13.81)     | 19.29 (13.62-28.02)       | <0.001 |
| Ferritin (ng/dL)                 |  | 7.00 (6.00-25.00)      | 449.00 (253.50-661.50) | 845.00 (458.00-1326.20)   | <0.001 |
| Troponin I (pg/mL)               |  | 1.60 (1.2-1.8)         | 5.5 (3.5-6.5)          | 14.80 (6.35-89.00)        | <0.001 |
| Lactate dehydrogenase (U/L)      |  | 179.00 (156.00-200.00) | 312.00 (280.00-422.00) | 542.50 (460.20-612.80)    | <0.001 |
| Creatine phosphokinase (U/L)     |  | 115.00 (65.00-154.00)  | 141.00 (50.50-230.00)  | 152.00 (97.25-492.25)     | 0.216  |
| D Dimer (ng/mL)                  |  | 259.00 (195.00-351.00) | 496.00 (417.00-789.50) | 1324.00 (1054.00-2400.00) | <0.001 |
| Thrombin time (Seconds)          |  | 10.40 (10.40-10.45)    | 12.90 (12.05-13.60)    | 11.95 (11.50-13.30)       | <0.001 |
| Thromboplastin time (Seconds)    |  | 29.90 (29.90-30.05)    | 32.70 (30.40-34.50)    | 32.75 (28.70-39.00)       | <0.001 |
| International Normalized Ratio   |  | 1.06 (1.06-1.06)       | 1.10 (1.00-1.20)       | 1.10 (1.00-1.20)          | 0.043  |
| Fibrinogen (mg/dL)               |  | 364.50 (332.80-413.00) | 603.00 (450.00-714.00) | 685.00 (522.00-816.20)    | <0.001 |
| <b>Arterial blood gases</b>      |  |                        |                        |                           |        |
| pH                               |  | 7.46 (7.46-7.46)       | 7.47 (7.44-7.48)       | 7.43 (7.380-7.46)         | 0.003  |
| PaCO2 (mmHg)                     |  | 28.92 (28.92-28.92)    | 30.30 (28.35-31.90)    | 31.30 (28.93-39.12)       | 0.001  |
| HCO3 (mmHg)                      |  | 20.34 (20.34-20.34)    | 21.80 (20.30-22.75)    | 21.40 (18.95-24.27)       | 0.011  |
| Lactate (mmol/L)                 |  | 1.14 (1.14-1.14)       | 1.20 (1.00-1.54)       | 1.80 (1.40-2.52)          | <0.001 |
| PaFi                             |  | 304.80 (304.80)        | 255.00 (219.50-306.50) | 109.50 (86.50-166.80)     | <0.001 |
| Anion Gap (mmol/L)               |  | 14.70 (14.70-14.70)    | 13.70 (12.85-15.15)    | 14.20 (11.93-16.75)       | 0.194  |
| Days since symptoms started      |  | 3.00 (2.00-5.75)       | 9.00 (7.00-14.00)      | 7.00 (5.00-11.00)         | <0.001 |

**Table S2.** Serum cytokine and chemokine levels of patients with COVID-19 according to disease severity.

| <b>Variable</b>              | <b>Mild/moderate<br/>Median (IQR)<br/>N=27</b> | <b>Severe<br/>Median (IQR)<br/>N=27</b> | <b>Critical<br/>Median (IQR)<br/>N=28</b> | <b>P-value</b> |
|------------------------------|------------------------------------------------|-----------------------------------------|-------------------------------------------|----------------|
| IL-1a (pg/mL)                | 13.94(7.21-57.00)                              | 9.44(1.93-24.00)                        | 18.38(11.22-25.42)                        | 0.174          |
| IL-1b (pg/mL)                | 2.54(0.38-3.80)                                | 0.62(0.36-1.81)                         | 3.29(2-27-4.66)                           | <0.001         |
| IL-1RA (pg/mL)               | 51.51(34.92-79.75)                             | 48.32(21.79-63.24)                      | 98.67(41.87-168.86)                       | 0.025          |
| IL-2 (pg/mL)                 | 1.38(0.40-2.05)                                | 0.64(0.36-1.32)                         | 1.86(1.54-2.07)                           | <0.001         |
| IL-3 (pg/mL)                 | 0.29(0.16-0.75)                                | 0.18(0.16-0.21)                         | 0.72(0.70-0.74)                           | <0.001         |
| IL-4 (pg/mL)                 | 62.58(11.90-245.31)                            | 11.90(11.90-76.02)                      | 50.96(40.26-67.91)                        | 0.065          |
| IL-5 (pg/mL)                 | 2.5(0.45-4.68)                                 | 0.85(0.60-2.12)                         | 2.51(1.94-4.30)                           | 0.033          |
| IL-6 (pg/mL)                 | 14.57(9.30-26.64)                              | 23.29(7.42-54.68)                       | 41.07(18.53-7.34)                         | 0.027          |
| IL-7 (pg/mL)                 | 6.85(2.50-11.61)                               | 10.11(6.94-16.88)                       | 12.11(9.24-17.48)                         | 0.035          |
| IL-8 (pg/mL)                 | 14.06(8.89-22.26)                              | 19.11(9.13-41.72)                       | 51.26(31.60-174.19)                       | <0.001         |
| IL-10 (pg/mL)                | 15.00(10.14-24.61)                             | 15.30(8.37-20.61)                       | 26.38(13.46-36.65)                        | 0.088          |
| IL-12p70 (pg/mL)             | 4.49(0.59-7.90)                                | 0.59(0.59-2.52)                         | 4.70(3.58-5.59)                           | <0.001         |
| IL-12p40 (pg/mL)             | 10.66(2.95-23.27)                              | 2.95(2.95-4.12)                         | 14.49(9.87-17.62)                         | 0.004          |
| IL-13 (pg/mL)                | 6.21(0.56-15.56)                               | 0.56(0.56-3.55)                         | 3.42(2.89-4.45)                           | 0.026          |
| IL-15 (pg/mL)                | 4.47(3.28-6.27)                                | 3.46(1.28-7.19)                         | 8.35(6.68-10.33)                          | <0.001         |
| IL-17A (pg/mL)               | 5.04(2.09-6.81)                                | 1.18(0.60-3.16)                         | 4.86(3.30-7.06)                           | 0.003          |
| IL-18 (pg/mL)                | 534.50(444.20-677.20)                          | 553.6(360.90-734.30)                    | 968.5(794.3-1015.40)                      | <0.001         |
| TNF- $\alpha$ (pg/mL)        | 15.79(10.70-20.51)                             | 19.00(15.43-26.07)                      | 24.88(17.70-32.90)                        | 0.001          |
| TNF- $\beta$ (pg/mL)         | 7.41(0.70-24.63)                               | 0.70(0.70-5.8)                          | 3.44(267.00-4.04)                         | 0.072          |
| TGF- $\beta$ 1 (pg/mL)       | 79954.00(67056.00-97678.00)                    | 87206(74317-99132)                      | 85937.00(73119.00-105938.00)              | 0.436          |
| TGF- $\beta$ 2 (pg/mL)       | 1092.50(764.10-3407.70)                        | 764.1(481.2-932.9)                      | 3407.70(2963.90-3515.80)                  | <0.001         |
| TGF- $\beta$ 3 (pg/mL)       | 1023.00(238.61-744.03)                         | 68.24(68.24-68.24)                      | 7444.03(744.03-744.03)                    | <0.001         |
| G-CSF (pg/mL)                | 36.18(18.89-75.31)                             | 3.87(3.87-34.33)                        | 37.10(25.69-49.88)                        | <0.001         |
| GM-CSF (pg/mL)               | 5.31(0.50-8.86)                                | 0.50(0.50-3.30)                         | 6.70(5.44-9.19)                           | <0.001         |
| VEGF (pg/mL)                 | 60.26(30.70-93.17)                             | 127.99(93.54-186.98)                    | 176.76(98.75-244.81)                      | <0.001         |
| EGF (pg/mL)                  | 93.65(57.88-152.24)                            | 121.65(93.58-165.17)                    | 129.89(76.38-216.85)                      | 0.171          |
| IFN- $\alpha$ 2 (pg/mL)      | 29.11(10.90-58.66)                             | 10.90(10.90-14.40)                      | 33.41(23.82-42.93)                        | <0.001         |
| IFN- $\gamma$ (pg/mL)        | 17.82(7.18-25.91)                              | 6.24(30.5-17.34)                        | 8.31(5.65-20.89)                          | 0.122          |
| MCP-1/CCL2 (pg/mL)           | 501.80(353.40-537.40)                          | 506.39(422.92-723.10)                   | 616.34(381.68-909.06)                     | 0.057          |
| MIP-1 $\alpha$ /CCL4 (pg/mL) | 3.29(0.70-7.54)                                | 0.78(0.70-5.28)                         | 5.01(3.49-8.08)                           | 0.015          |



|                                |                             |                         |                             |       |
|--------------------------------|-----------------------------|-------------------------|-----------------------------|-------|
| MIP-1 $\beta$ /CCL3<br>(pg/mL) | 28.30(16.95-37.88)          | 30.82(22.61-37.70)      | 48.30(29.19-69.10)          | 0.003 |
| IP-10/CXCL10<br>(pg/mL)        | 1414.80(644.90-<br>1849.10) | 1766.40(923.90-3610.90) | 3193.80(900.80-<br>4934.90) | 0.017 |
| Eotaxin/CCL11<br>(pg/mL)       | 97.20(74.94-<br>118.93)     | 80.11(60.34-113.75)     | 74.28(59.56-95.33)          | 0.213 |
